# Supplementary material for: Epidemiology of HEV Infection in Blood Donors in Southern Switzerland
Source: MDPI journal article supplement (doi:10.3390/microorganisms11102375), 2023-09-22
Supplement: s1 [file s1]

## Supplementary Material to Fontana et al.

**Table S1. Demographics and distribution of the blood donors tested for HEV IgG and IgM by the districts studied. 95% CI: 95% confidence interval of the mean.**

|                                 | <b>2012-2013<br/>(N=1,283)</b> | <b>2017-2019<br/>(N=1,447)</b> | <b>p-value</b> |
|---------------------------------|--------------------------------|--------------------------------|----------------|
| <b>By district</b>              |                                |                                |                |
| <i><b>Bellinzona</b></i>        |                                |                                |                |
| count (% of each sample)        | 173 (13.48)                    | 222 (15.34)                    |                |
| mean age (95% CI)               | 47.65 (45.81–49.5)             | 47.26 (45.54–48.98)            |                |
| median age (min–max)            | 49 (19–71)                     | 48 (21–75)                     |                |
| <i><b>Blenio</b></i>            |                                |                                |                |
| count (% of each sample)        | 77 (6.00)                      | 57 (3.94)                      |                |
| mean age (95% CI)               | 45.97 (43.51–48.43)            | 47.16 (44.08–50.24)            |                |
| median age (min–max)            | 45 (23–70)                     | 49 (19–71)                     |                |
| <i><b>Leventina</b></i>         |                                |                                |                |
| count (% of each sample)        | 126 (9.82)                     | 129 (8.91)                     |                |
| mean age (95% CI)               | 48.63 (46.46–50.8)             | 49.47 (47.34–51.6)             |                |
| median age (min–max)            | 49.5 (19–68)                   | 51 (18–71)                     |                |
| <i><b>Locarno</b></i>           |                                |                                |                |
| count (% of each sample)        | 132 (10.29)                    | 190 (13.13)                    |                |
| mean age (95% CI)               | 47.90 (45.69–50.11)            | 46.78 (44.87–48.7)             |                |
| median age (min–max)            | 50 (18–71)                     | 49 (18–73)                     |                |
| <i><b>Lugano</b></i>            |                                |                                |                |
| count (% of each sample)        | 334 (26.03)                    | 428 (29.58)                    |                |
| mean age (95% CI)               | 45.62 (44.32–46.93)            | 47.59 (46.35–48.83)            |                |
| median age (min–max)            | 47 (18–72)                     | 51 (18–73)                     |                |
| <i><b>Mendrisio</b></i>         |                                |                                |                |
| count (% of each sample)        | 197 (15.35)                    | 197 (13.61)                    |                |
| mean age (95% CI)               | 46.68 (44.92–48.43)            | 47.02 (45.13–48.91)            |                |
| median age (min–max)            | 48 (19–72)                     | 50 (18–73)                     |                |
| <i><b>Riviera</b></i>           |                                |                                |                |
| count (% of each sample)        | 78 (6.08)                      | 63 (4.35)                      |                |
| mean age (95% CI)               | 44.96 (42.01–47.91)            | 41.24 (37.84–44.63)            |                |
| median age (min–max)            | 45.5 (19–68)                   | 43 (19–66)                     |                |
| <i><b>Vallemaggia</b></i>       |                                |                                |                |
| count (% of each sample)        | 73 (5.69)                      | 73 (5.04)                      |                |
| mean age (95% CI)               | 39.10 (36.13–42.07)            | 43.75 (40.66–46.85)            |                |
| median age (min–max)            | 40 (19–67)                     | 46 (19–74)                     |                |
| <i><b>Grigioni Italiano</b></i> |                                |                                |                |
| count (% of each sample)        | 93 (7.25)                      | 88 (6.08)                      |                |
| mean age (95% CI)               | 46.17 (43.87–48.48)            | 46.43 (44.08–48.78)            |                |
| median age (min–max)            | 47 (18–66)                     | 47.5 (21–67)                   |                |

**Table S2. IgG and IgM seroprevalence in blood donors [frequency (%): overall and split by districts.**

|                   | N IgG pos (%) |             |  | N IgM pos (%) |           |
|-------------------|---------------|-------------|--|---------------|-----------|
|                   | 2012-2013     | 2017-2019   |  | 2012-2013     | 2017-2019 |
| By district       |               |             |  |               |           |
| Bellinzona        | 61 (35.26)    | 75 (33.78)  |  | 4 (2.31)      | 6 (2.70)  |
| Blenio            | 23 (29.87)    | 24 (42.11)  |  | 3 (3.90)      | 2 (3.51)  |
| Leventina         | 55 (43.65)    | 48 (37.21)  |  | 3 (2.38)      | 3 (2.33)  |
| Locarno           | 32 (24.24)    | 61 (32.11)  |  | 1 (0.76)      | 3 (1.58)  |
| Lugano            | 99 (29.64)    | 112 (26.17) |  | 5 (1.50)      | 11 (2.57) |
| Mendrisio         | 55 (27.92)    | 50 (25.38)  |  | 4 (2.03)      | 4 (2.03)  |
| Riviera           | 29 (37.18)    | 22 (34.92)  |  | 1 (1.28)      | 4 (6.35)  |
| Vallemaggia       | 23 (31.51)    | 26 (35.62)  |  | 4 (5.48)      | 6 (8.22)  |
| Grigioni Italiano | 44 (47.31)    | 32 (36.36)  |  | 1 (1.08)      | 1 (1.14)  |

**Table S3. IgG seroprevalence in blood donors: Results of the logistic regression analysis using gender, age category, sampling period, and areas as independent variables. Interactions terms were not statistically significant. OR: Odds Ratios; SE: standard error; p: statistical significance; 95% CI: 95% confidence intervals of the OR.**

|                        | OR        | SD    | p      | 95% CI     |
|------------------------|-----------|-------|--------|------------|
| <i>gender</i>          |           |       |        |            |
| male                   | reference |       |        |            |
| female                 | 0.76      | 1.19  | 0.846  | 0.02–18.06 |
| <i>age (years)</i>     |           |       |        |            |
| 18                     | reference |       |        |            |
| >18                    | 1.02      | 0.03  | 0.000  | 1.02–1.03  |
|                        |           |       |        |            |
|                        |           |       |        |            |
| <i>sampling period</i> |           |       |        |            |
| 2012-2013              | reference |       |        |            |
| 2017-2019              | 0.926     | 0.078 | 0.362  | 0.78–1.09  |
| <i>region</i>          |           |       |        |            |
| South                  | reference |       |        |            |
| Centre                 | 1.23      | 0.129 | 0.052  | 0.99–1.50  |
| North                  | 1.70      | 0.167 | <0.001 | 1.40–2.06  |
